# Supplementary material
Source: PubMed Central journal article supplement (PMC4710139)
Supplement: NIHMS744268-supplement-supplement_1.pdf [file NIHMS744268-supplement-supplement_1.pdf]

**Supplementary figure 1. Neighbor-joining tree including all the sequences from the twelve subjects from which HIV RNA was amplified from urine.** Blue triangles: urine RNA; Full red circles: PBMCs; Empty red circles: Plasma RNA; Green diamond: urine cell-associate DNA. For subjects 264 and 265 urine cell associated DNA sequences are between 1000 and 1400 bp in length. All the other sequences are the full-length HIV-1 *env*.

**Supplementary figure 2. Correlative analysis between the number of HIV-1 sequences amplified from urine and plasma viral load, accounting for the different urine volumes for each patients.** Spearman R= 0.3759; P= 0.0703 (number of urinary sequences vs plasma viral load); Spearman R= 0.1049; P= 0.6256 (number of urinary sequences vs urine volume).

**Supplementary table 1. Characteristics of all study participants.**

| Subject ID | Ethnicity              | Gender | Plasma viral load (copies/mL) | CD4 count (cells/mm <sup>3</sup> ) | Urine Volume (mL) | # of Urine SGA |
|------------|------------------------|--------|-------------------------------|------------------------------------|-------------------|----------------|
| 174        | Black/African American | F      | 20,000                        | 1072                               | 400               | 0              |
| 262        | Black/African American | F      | 12,200                        | 1201                               | 400               | 0              |
| 263        | White                  | F      | 78,000                        | 554                                | 142               | 0              |
| 264        | Black/African American | F      | 3,600,000                     | 26                                 | 400               | 5              |
| 257        | Black/African American | F      | 400,000                       | 151                                | 300               | 0              |
| 260        | Black/African American | F      | 2040                          | 200                                | 520               | 0              |
| 265        | Black/African American | M      | 23,400                        | 151                                | 400               | 2              |
| 266        | Asian                  | M      | 180,000                       | 495                                | 170               | 1              |
| 267        | White                  | F      | 4460                          | 466                                | 35                | 17             |
| 268        | Black/African American | M      | 486,000                       | 115                                | 630               | 0              |
| 269        | Black/African American | F      | 211,000                       | 316                                | 430               | 28             |
| 270        | Black/African American | F      | 140,000                       | 233                                | 600               | 3              |
| 271        | Black/African American | M      | 1,100,000                     | 1119                               | 200               | 2              |
| 272        | Black/African American | M      | 297,000                       | 251                                | 100               | 0              |
| 273        | Other                  | M      | 4,290                         | 921                                | 100               | 0              |
| 274        | Black/African American | M      | 122,000                       | 272                                | 484               | 0              |
| 275        | Black/African American | M      | 158,000                       | 252                                | 485               | 2              |
| 276        | Black/African American | F      | 46,500                        | 425                                | 83                | 2              |

|     |                        |   |         |      |     |    |
|-----|------------------------|---|---------|------|-----|----|
| 277 | Black/African American | M | 7,128   | 99   | 90  | 0  |
| 279 | Black/African American | F | 1,370   | 741  | 570 | 0  |
| 280 | Black/African American | F | 220,000 | 47   | 320 | 31 |
| 288 | Black/African American | M | 171,000 | 4    | 100 | 0  |
| 290 | Black/African American | M | 490,000 | 320  | 550 | 26 |
| 291 | White                  | M | 81,700  | 306  | 530 | 2  |
| 311 | Black/African American | F | <20     | 677  | 54  | 0  |
| 312 | White                  | M | <20     | 1062 | 250 | 0  |
| 313 | Black/African American | M | <20     | 148  | 550 | 0  |
| 314 | Black/African American | F | <20     | 1448 | 430 | 0  |
| 315 | Black/African American | M | <20     | 488  | 460 | 0  |
| 316 | Black/African American | M | <20     | 571  | 307 | 0  |
| 317 | Black/African American | M | <20     | 324  | 460 | 0  |
| 052 | White                  | M | <20     | 933  | 350 | 0  |
| 318 | Black/African American | F | <20     | 433  | 370 | 0  |
| 319 | Black/African American | F | <20     | 1131 | 440 | 0  |
| 320 | Black/African American | F | <20     | 1067 | 460 | 0  |



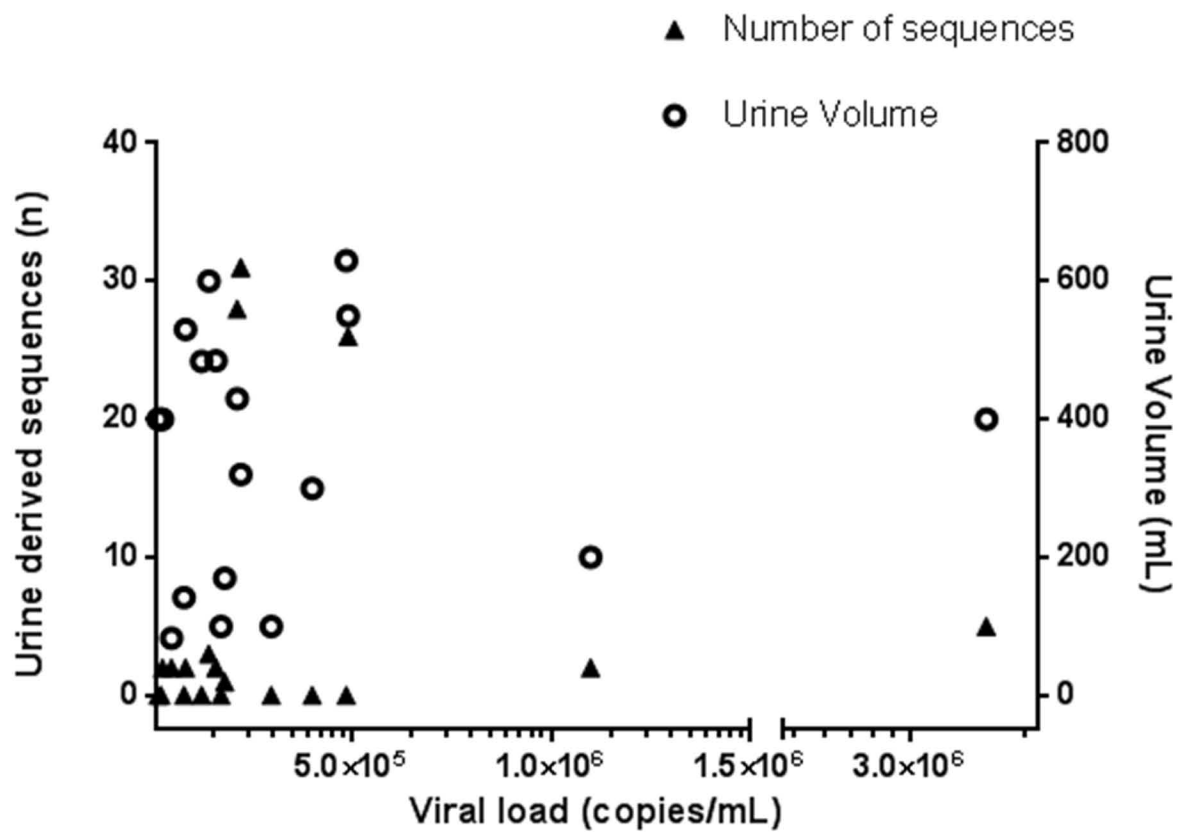

Supplementary figure 2
